# Supplementary material for: The versatility of N,O-dialkylphosphoramidate stationary phase-separations in HILIC, highly aqueous RP LC conditions and purely aqueous mobile phase
Source: Royal Society of Chemistry journal article supplement (doi:10.1039/c7an01634d), 2018-01-01
Supplement: c7an01634d1.pdf [file c7an01634d1.pdf]

Supplementary materials only for Review

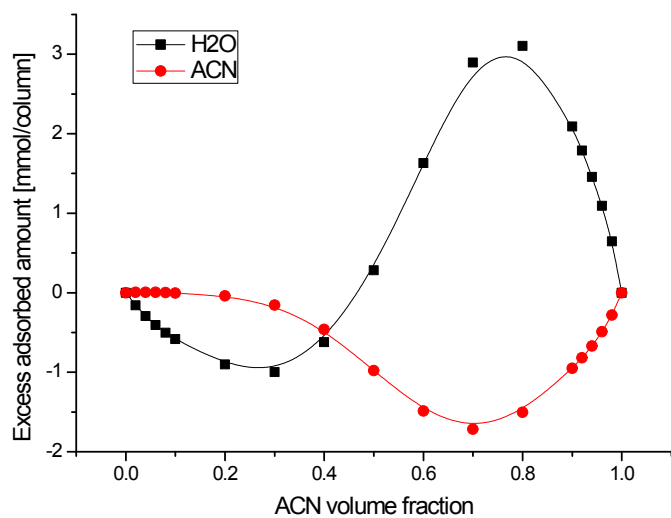

Figure S1 Excess adsorption isotherm of ACN and water on Amino-bonded stationary phase (synthesized on the same silica gel Kromasil 100A), column dimension 125×4.6 mm

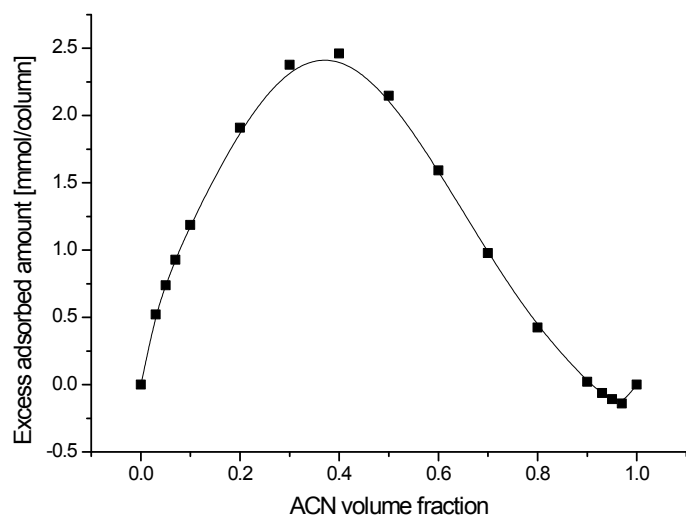

Figure S2 Excess adsorption isotherm of ACN on C18 stationary phase (synthesized on the same silica gel Kromasil 100A), column dimension 125×4.6 mm.
