# Supplementary material for: The versatility of N,O-dialkylphosphoramidate stationary phase-separations in HILIC, highly aqueous RP LC conditions and purely aqueous mobile phase
Source: Royal Society of Chemistry journal article supplement (doi:10.1039/c7an01634d), 2018-01-01
Supplement: c7an01634d2.pdf [file c7an01634d2.pdf]

Supplement 1 Parameters obtained for modeling of equation 1

| Substance                       | Parameters  |                 |                    |              |                |               |                |
|---------------------------------|-------------|-----------------|--------------------|--------------|----------------|---------------|----------------|
|                                 | a           | m <sub>RP</sub> | m <sub>HILIC</sub> | b            | R <sup>2</sup> | F             | p              |
| pseudouridine                   | 1.40        | 40.51           | 118.11             | 0.43         | 0.9868         | <u>154.32</u> | <u>1.37E-4</u> |
| uridine                         | 1.10        | 91.72           | 481.41             | 0.21         | 0.8837         | <u>23.65</u>  | <u>0.002</u>   |
| 1-methyladenosine               | 1.21        | 196.14          | 2140.49            | 0.09         | 0.9630         | <u>55.95</u>  | <u>2.87E-4</u> |
| 1-methylinosine                 | 1.15        | 210.08          | 2530.20            | 0.09         | 0.9619         | <u>54.55</u>  | <u>3.05E-4</u> |
| 2-deoxythymidine                | 0.63        | 111.31          | 785.01             | 0.15         | 0.9690         | <u>80.29</u>  | <u>1.19E-4</u> |
| cytidine                        | 1.91        | 57.33           | 187.87             | 0.37         | 0.9571         | <u>45.55</u>  | <u>4.71E-4</u> |
| 1-methylguanosine               | 1.49        | 282.81          | 4113.49            | 0.07         | 0.9756         | <u>80.86</u>  | <u>1.17E-4</u> |
| adenosine                       | 1.26        | 77.72           | 330.28             | 0.27         | 0.9516         | <u>40.06</u>  | <u>6.40E-4</u> |
| guanosine                       | 2.15        | 64.17           | 223.11             | 0.34         | 0.9416         | <u>36.57</u>  | <u>7.95E-4</u> |
| 7-methylguanosine               | 1.58        | 49.38           | 175.62             | 0.33         | 0.8953         | <u>25.65</u>  | <u>0.002</u>   |
| N <sub>2</sub> -methylguanosine | 1.93        | 379.96          | 7914.96            | 0.05         | 0.9707         | <u>91.80</u>  | <u>8.59E-5</u> |
| 8-bromoguanosine                | 1.57        | 208.71          | 2624.48            | 0.08         | 0.9647         | <u>68.34</u>  | <u>6.82E-4</u> |
| cytosine                        | 1.24        | 179.17          | 2631.43            | 0.07         | 0.9587         | <u>48.91</u>  | <u>3.97E-4</u> |
| uracil                          | 0.40        | 28.79           | 87.89              | 0.40         | 0.9833         | <u>300.40</u> | <u>4.60E-6</u> |
| thymine                         | <u>1.55</u> | <u>5.11</u>     | <u>2.46</u>        | <u>13.19</u> | <u>0.9046</u>  | <u>24.98</u>  | <u>0.002</u>   |
| guanine                         | 1.52        | 161.27          | 1937.53            | 0.09         | 0.9675         | <u>58.89</u>  | <u>9.12E-4</u> |
| adenine                         | 1.31        | 318.58          | 6690.78            | 0.05         | 0.9346         | <u>38.86</u>  | <u>7.81E-4</u> |
